# Supplementary material for: Selective Targeting of CTNNB1-, KRAS- or MYC-Driven Cell Growth by Combinations of Existing Drugs
Source: PLoS One. 2015 May 27;10(5):e0125021. doi: 10.1371/journal.pone.0125021 (PMC4446296; doi:10.1371/journal.pone.0125021)
Supplement: S3 Table — (XLSX) [file pone.0125021.s003.xlsx]

## Sheet: legend
Uitdehaag et al. supplementary Table S3
Table S3
list of IC50 values of compounds used for combination studies, as measured in the 44 cell line panel. IC50s in nanomolar.
data were generated at the Netherlands Translational Research Center: www.ntrc.nl
The profiles of dabrafenib, gefitinib, trametinib and vemurafenib have been published earlier in PLOS ONE 9, e92146 and are given for comparison
Legend
all values are IC50 in nM
>	exceeds IC50 value (in nM)
						0.501187

## Sheet: Table S3
cell line	ICG-001	vemurafenib	AZD-6244	GDC-0941	neratinib	docetaxel	gefitinib	GSK-1070916	dabrafenib	TAK-165	paclitaxel	trametinib
769-P	15161.4	>31600	1725.56	5870	2360	10.3804	11367.5	92.536	10874.9	50.1291	73.2562	84.7032
786-O	6587.92	22624.4	>31600	2108.03	1711.45	17.1603	11271.6	2137.57	3296.69	58.5292	134.284	25803.8
A-172	4585.4	>31600	29455.2	696.409	1819.73	3.24897	14137.4	20.6277	3501.29	306.346	16.5087	110.377
A-204	4825.61	>31600	>31600	112.788	1964.88	3.10931	12006.6	7.90374	4690.44	136.815	5.60815	631.015
A375	6090.51	3977.62	254.465	1194.33	1207.96	5.51776	12030.5	35.5695	26.1066	>31600	39.1665	12.6464
A-427	2796.72	>31600	3559.02	764.672	1473.04	3.50015	10887.8	35.763	3449.48	53.9387	24.0048	16.6038
A-498	6126.16	20616.5	>31600	1243.73	865.185	12.9916	6966.53	73.1882	2282.94	37.517	55.7838	22271
A-549	4705.44	29218.1	1030	724.808	1207.97	2.14221	12555.2	18.7303	4118.13	77.7323	11.5971	56.735
ACHN	18601.2	24038.2	>31600	395.979	450.951	20.5558	3706.26	1885.27	1153.64	>31600	94.7086	495.625
AN3 CA	6772.02	>31600	2566.15	352.828	2278.49	0.902117	15091.2	8.24264	>31600	98.8393	3.57721	13581.4
AU-565	2375.73	>31600	>31600	391.511	6.82622	2.2225	819.745	15.9186	5915.15	>31600	4.10111	19376.8
BT-20	12031.2	>31600	>31600	2119.65	>10000	8.65363	>31600	9.55945	>31600	74.1134	48.7012	>31600
BT-549	3125.94	26899.5	>31600	1201.27	1895.59	2.84552	15859	1883.76	5729.24	44.9134	37.5606	17695
BxPC-3	3080.7	14169	5347.51	798.585	1224.15	3.35129	4450	1598.78	2676.74	62.9449	8.59584	29.2201
C-33 A	2776.65	>31600	37	681.034	43.0991	2.85308	614.506	1050.95	3307.61	38.6506	9.62232	8.19301
CAL 27	4440.67	>31600	2690	1558.73	387.31	1.64306	56.2726	27.5321	30802.5	133.42	6.51765	57.9091
CCRF-CEM	4828.77	22971.2	>31600	1586.41	1246.79	6.44928	11866.8	22.0622	>31600	54.7868	100.863	28021.7
DLD-1	12159.3	>31600	>31600	1346.92	1164.8	23.1147	7811.65	5274.85	3917.71	121.338	187.64	492.652
FaDu	5999.59	>31600	>31600	975.531	52.0225	1.1832	62.4974	23.1734	4383.71	44.4998	13.5931	13.59
HCT 116	2313.53	>31600	1745.25	1104.8	1255.22	2.08652	13643.4	10.8279	850.026	74.7503	4.76727	34.6259
HCT-15	17928	30618.6	>31600	1074.66	1106.54	58.035	9609.97	118.716	3332.96	51.7924	295.219	2040.89
Hs 578T	3053.89	24846.3	>31600	966.759	1594.95	2.13486	12589	22.876	11540.9	>31600	51.6112	370.599
J82	7270.22	>31600	>31600	910.396	2051.18	15.2217	15373.6	2308.95	>31600	>31600	19.0638	>31600
Jurkat E6-1	4045.81	27140.8	>31600	1586.39	587.75	2.09915	8487.06	901.027	3120.45	16.7833	4.56585	>31600
K-562	2927.29	29855.4	389.669	1529.25	2723.9	2.6776	12006.6	14.8567	13537	22.1044	5.99545	36.9249
LoVo	2976.75	31267.2	552.896	1087.46	699.361	8.29098	4271.85	725.941	1858.51	174.069	22.6995	8.40491
LS 174T	3182.65	>31600	1058.37	1310.83	1796.92	2.22001	11932.5	29.2863	>31600	24.6025	12.0593	36.7972
MeWo	4558.08	>31600	1417.37	1558.57	2149.05	2.6274	14040.2	3968.84	6493.05	>31600	13.2049	32.9902
MG-63	3190.12	>31600	25772.1	1107.1	2703.95	1.08212	15321	21.7868	>31600	643.358	6.17653	119.402
MOLT-4	1631.4	31110.8	>31600	390.958	960.372	1.73697	11158.9	5.96697	29088.1	65.2703	2.45811	19299.5
NCI-H460	3487.66	30428.8	139.632	624.62	1819.2	5.57244	12784.1	19.194	2977.54	58.593	9.30758	14.0655
NCI-H82	2776.13	30441.2	>31600	798.988	1237.35	1.37422	8548.79	6.29849	2541.95	40.9494	7.42299	24704
OVCAR-3	2454.12	>31600	>31600	508.813	1837.69	4.00745	16737.6	62.269	5263.98	41.4964	25.7541	>31600
PA-1	1852.78	10310.5	>31600	1520.19	590.679	0.942736	7183.36	9.13674	2106.46	43.3495	9.21698	435.978
RPMI-7951	3067.77	20874.4	339.642	1022.56	1942.93	1.90422	13185.4	24.7304	24.2731	>31600	28.5039	9.69982
SHP-77	29244.1	>31600	>31600	2878.53	5135.92	138.277	13525.4	>31600	28868.9	113.681	404.622	>31600
SJCRH30	2660.35	>31600	>31600	827.628	2984.31	2.45059	10504.7	1151.04	>31600	>31600	7.42456	782.546
SK-N-AS	6127.64	>31600	57.0035	1441.84	1151.72	3.36906	10806.3	18.1272	3551.01	71.6955	29.0613	9.51885
SR	3544.73	8857.34	>31600	1270	1410	2.16728	8640.64	12.1732	2121.53	32.921	9.55215	950.116
SW48	3832.77	>31600	13.0908	336.906	>10000	3.39094	>31600	31.0985	10640.4	49.2099	27.8626	1.20114
SW480	2940.95	22514.4	14996.4	1273.96	3359.32	3.33658	15813.7	466.032	16601.7	38.5607	21.1522	574.005
SW620	4377.98	31563.3	13.679	1203.62	2320.23	2.25251	25073.6	27.421	2466.72	26.1368	18.2533	1.35042
U-2 OS	8584.78	>31600	11548.6	515.502	1206.44	7.41366	9980.19	817.512	>31600	91.9074	53.8192	311.407
U-87 MG	5224.65	>31600	>31600	807.254	3944.66	11.1284	15807.3	>31600	>31600	>31600	25.7404	228.963
