# Supplementary material for: Selective Targeting of CTNNB1-, KRAS- or MYC-Driven Cell Growth by Combinations of Existing Drugs
Source: PLOS journal article supplement (doi:10.1371/journal.pone.0125021), 2015-05-27

**Supplementary Figure S5.** Curve shift experiments of the combination of neratinib (HKI-272, blue) and docetaxel (green) in various cell lines. For panel **G**, the 100 % effect level was set to the response at the highest concentration tested. In panel **C**, one ratio was omitted because of technical failure. Mixture ratios used were 1:1, red; 4:1, orange; 1:4, yellow. CI values and standard deviations (SD) are based on three mixtures (see Table S4 for individual values)

Lung cancer cell lines. *MYC*-amplified (left) and non-*MYC*- amplified (2 panels on the right)

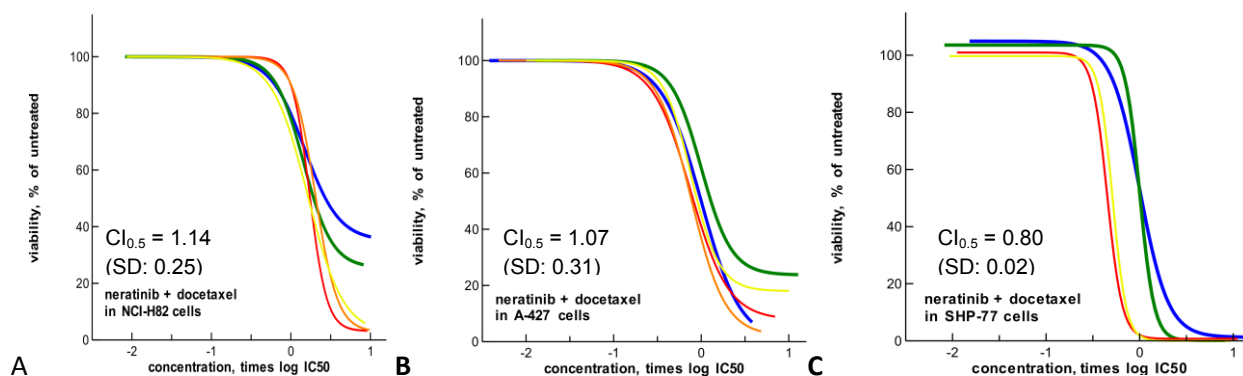

Breast cancer cell lines. *MYC*-amplified (left) and non-*MYC*- amplified (right)

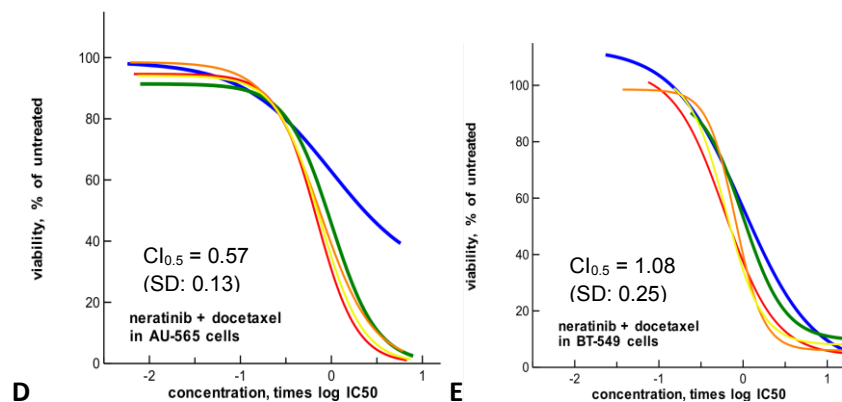

Colon cancer cell lines. *MYC*-amplified (left) and non-*MYC*- amplified (right)

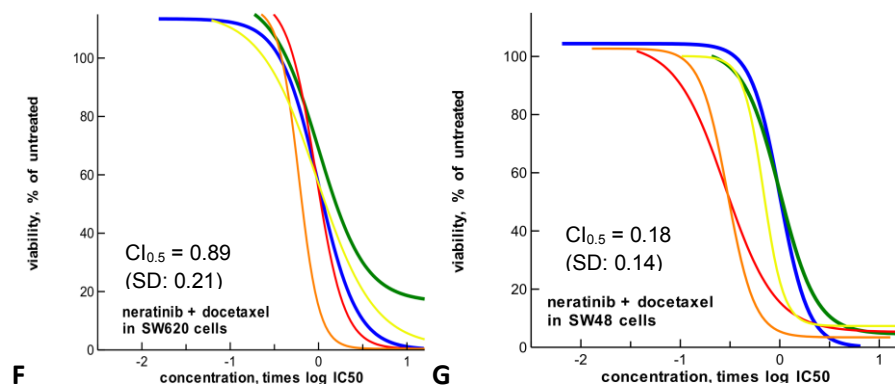

Supplement: S10 (10.1371/journal.pone.0125021.s010) [file journal.pone.0125021.s010]
