# Supplementary material for: Selective Targeting of CTNNB1-, KRAS- or MYC-Driven Cell Growth by Combinations of Existing Drugs
Source: PLOS journal article supplement (doi:10.1371/journal.pone.0125021), 2015-05-27

**Supplementary Figure S8.** Curve shift experiment of the combination of MLN-8054 (green) and TAK-165 (blue). Mixture ratios used were 1:1, red; 4:1, orange; 1:4, yellow. CI values and standard deviations (SD) are based on three mixtures (see Table S4 for individual values)

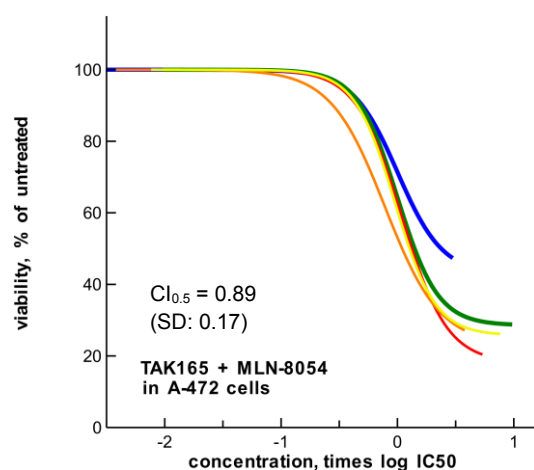

Supplement: S13 (10.1371/journal.pone.0125021.s013) [file journal.pone.0125021.s013]
